# Supplementary material
Source: PubMed Central journal article supplement (PMC3911615)
Supplement: JVI.02797-13_zjv999098595so1.pdf [file JVI.02797-13_zjv999098595so1.pdf]

## Supplementary Figure Legend

**Suppl. Fig S1.** An alignment of the deduced amino acid sequences of the 97 Australian BEFV isolates used for evolutionary analysis. The isolates are colored according to the four identified antigenic sub-types: Type I = red; Type II = blue; Type III = green; Type IV = purple. Variable amino acids are highlighted in the sequence and highly variable sites are indicated with arrows. Known or proposed antigenic sites are shaded in grey with variant amino acids previously identified in escape mutants by Kongsuwan *et al.* (13) highlighted in black.













**Suppl. Table S1.** Australian and exotic BEFV sequences in this study.

| <b>Isolate</b>             | <b>Source</b> | <b>Location</b> | <b>Map coordinates</b>  | <b>Date of isolation</b> | <b>Passage History*</b> | <b>Sequence ambiguities</b> | <b>Genbank accession</b> |
|----------------------------|---------------|-----------------|-------------------------|--------------------------|-------------------------|-----------------------------|--------------------------|
| <b>QUEENSLAND ISOLATES</b> |               |                 |                         |                          |                         |                             |                          |
| <b>BB7721</b>              | Bovine        | Charters Towers | 20° 04' S<br>146° 15' E | Jan 1968                 | 1SMB                    |                             |                          |
| <b>CS1818</b>              | Bovine        | Upper Barron    | 17° 21' S<br>145° 35' E | Jun 1970                 | xSMB/1C6/2BHK2          |                             | AF058325                 |
| <b>CS1867</b>              | Bovine        | Etna Creek      | 23° 13' S<br>150° 28' E | Nov 1970                 | 3SMB/2C6                |                             |                          |
| <b>CS1869</b>              | Bovine        | Etna Creek      | 23° 13' S<br>150° 28' E | Nov 1970                 | 2SMB                    |                             |                          |
| <b>CS1870</b>              | Bovine        | Etna Creek      | 23° 13' S<br>150° 28' E | Nov 1970                 | 2C6                     |                             |                          |
| <b>CS1873</b>              | Bovine        | Etna Creek      | 23° 13' S<br>150° 28' E | Nov 1970                 | 2SMB/2C6                |                             |                          |
| <b>CS1901</b>              | Bovine        | Peachester      | 26° 51' S<br>152° 53' E | Feb 1988                 |                         | Not sequenced               |                          |
| <b>CS1902</b>              | Bovine        | Etna Creek      | 23° 13' S<br>150° 28' E | Nov 1970                 | 1C6                     |                             |                          |
| <b>CS1903</b>              | Bovine        | Etna Creek      | 23° 13' S<br>150° 28' E | Nov 1970                 | 1C6                     |                             |                          |
| <b>CS1904</b>              | Bovine        | Etna Creek      | 23° 13' S<br>150° 28' E | Nov 1970                 | 1C6                     |                             |                          |
| <b>CS1941</b>              | Bovine        | Rockhampton     | 23° 22' S<br>150° 31' E | 6 Nov 1970               | 5SMB/1C6                |                             |                          |
| <b>CS1938</b>              | Bovine        | Munna Creek     | 25° 53' S<br>152° 27' E | 16 Nov 1970              | 1C6                     |                             |                          |
| <b>CS1940</b>              | Bovine        | Etna Creek      | 23° 13' S<br>150° 28' E | 17 Nov 1970              | 1C6                     |                             |                          |
| <b>CS660</b>               | Bovine        | Etna Creek      | 23° 13' S<br>150° 28' E | Nov 1970                 | 10SMB/5BHK/2C6          |                             |                          |
| <b>CS1939</b>              | Bovine        | Etna Creek      | 23° 13' S<br>150° 28' E | 15 Dec 1970              | 1C6                     |                             |                          |
| <b>CS1942</b>              | Bovine        | Camp Mountain   | 27° 23' S               | 2 Jan 1971               | 1C6                     |                             |                          |



|               |        |             |                         |             |               |                           |
|---------------|--------|-------------|-------------------------|-------------|---------------|---------------------------|
|               |        |             | 152° 53' E              |             |               |                           |
| <b>CS1930</b> | Bovine | Etna Creek  | 23° 13' S<br>150° 28' E | 26 May 1973 | 1C6           |                           |
| <b>CS1931</b> | Bovine | Etna Creek  | 23° 13' S<br>150° 28' E | 3 Jun 1973  | 1C6           | G/a pos 752; G/t pos 1340 |
| <b>CS1932</b> | Bovine | Etna Creek  | 23° 13' S<br>150° 28' E | 3 Jun 1973  | 1C6           |                           |
| <b>CS1933</b> | Bovine | Etna Creek  | 23° 13' S<br>150° 28' E | 5 Jun 1973  | 1C6           |                           |
| <b>CS1935</b> | Bovine | Belmont     | 23° 14' S<br>150° 32' E | 3 Jun 1973  | 1C6           | C/A pos 653               |
| <b>CS1819</b> | Bovine | Wacol       | 27° 35' S<br>152° 55' E | Nov 1973    | xSMB/3C6/3BHK |                           |
| <b>CS1925</b> | Bovine | Tolga       | 17° 13' S<br>145° 29' E | 13 Mar 1975 | 1C6           |                           |
| <b>CS1926</b> | Bovine | Kairi       | 17° 13' S<br>145° 32' E | 10 Apr 1975 | 1C6           |                           |
| <b>CS1821</b> | Bovine | Amberley    | 27° 38' S<br>152° 42' E | Nov 1975    | xSMB/3C6/3BHK |                           |
| <b>CS1820</b> | Bovine | Peachester  | 26° 51' S<br>152° 53' E | Jan 1976    | xSMB/3C6/3BHK |                           |
| <b>CS968</b>  | Bovine | Jimboomba   | 27° 50' S<br>153° 02' E | Dec 1979    | 2C6           |                           |
| <b>CS355</b>  | Bovine | Peachester  | 26° 51' S<br>152° 53' E | Feb 1980    | 6BHK          |                           |
| <b>CS366</b>  | Bovine | Peachester  | 26° 51' S<br>152° 53' E | Feb 1980    | 6BHK          |                           |
| <b>CS967</b>  | Bovine | Kairi       | 17° 13' S<br>145° 32' E | Feb 1981    | 3SMB/4BHK     |                           |
| <b>CS1362</b> | Bovine | Samford     | 27° 22' S<br>152° 53' E | Nov 1981    | 3SMB/3C6/3BHK |                           |
| <b>CS1179</b> | Bovine | Peachester  | 26° 51' S<br>152° 53' E | Jan 1982    | 4BHK          |                           |
| <b>CS1180</b> | Bovine | Peachester  | 26° 51' S<br>152° 53' E | Jan 1982    | 3C6/BHK3      | AF058321                  |
| <b>CS1188</b> | Bovine | Long Pocket | 27° 31' S<br>152° 59' E | Jan 1982    | 3C6/4BHK      |                           |
| <b>CS1204</b> | Bovine | Jimboomba   | 27° 50' S               | Jan 1982    | 3C6/8BHK      |                           |

|               |                       |                  |                         |             |          |                                           |
|---------------|-----------------------|------------------|-------------------------|-------------|----------|-------------------------------------------|
|               |                       |                  | 153° 02' E              |             |          |                                           |
| <b>CS1618</b> | Bovine                | Peachester       | 26° 51' S<br>152° 53' E | Jan 1984    | 3C6/5BHK |                                           |
| <b>CS1619</b> | Bovine                | Peachester       | 26° 51' S<br>152° 53' E | Jan 1984    | 3C6/BHK5 | AF058323                                  |
| <b>CS1622</b> | <i>An. bancroftii</i> | Peachester       | 26° 51' S<br>152° 53' E | Feb 1984    | 1C6/1BHK |                                           |
| <b>CS1647</b> | <i>C. brevitarsis</i> | Peachester       | 26° 51' S<br>152° 53' E | Feb 1984    | 1C6/4BHK | AF058322                                  |
| <b>CS1900</b> | Bovine                | Peachester       | 26° 51' S<br>152° 53' E | Feb 1988    | ?SMB/1C6 |                                           |
| <b>CS1899</b> | Bovine                | Boonah           | 28° 00' S<br>152° 41' E | Nov 1988    | 1C6      |                                           |
| <b>CS1905</b> | Bovine                | Amberley         | 27° 38' S<br>152° 42' E | Jan 1989    | 1C6      | C/T pos 1403                              |
| <b>CS1906</b> | Bovine                | Samford          | 27° 22' S<br>152° 53' E | Jan 1989    | 1C6      | C/T pos 125                               |
| <b>CS1907</b> | Bovine                | Samford          | 27° 22' S<br>152° 53' E | Jan 1989    | 1C6      |                                           |
| <b>CS1908</b> | Bovine                | Samford          | 27° 22' S<br>152° 53' E | Jan 1989    | 1C6      |                                           |
| <b>CS1909</b> | Bovine                | Greenmount       | 27° 47' S<br>151° 54' E | Jan 1989    | 1C6      | G/A pos 607; G/a pos 784;<br>A/g pos 1043 |
| <b>CS1910</b> | Bovine                | Samford          | 27° 22' S<br>152° 53' E | Jan 1989    | 1C6      | G/A pos 1377; T/g pos 1393                |
| <b>CS1911</b> | Bovine                | Closeburn        | 27° 19' S<br>152° 52' E | Jan 1989    | 1C6      |                                           |
| <b>CS1912</b> | Bovine                | Drapers Crossing | 27° 21' S<br>152° 55' E | Feb 1989    | 1C6      |                                           |
| <b>CS1913</b> | Bovine                | Oakey            | 27° 26' S<br>151° 43' E | Feb 1989    | (1C6)?   |                                           |
| <b>CS1914</b> | Bovine                | Toowoomba        | 27° 34' S<br>151° 57' E | 28 Feb 1989 | (1C6)?   | G/a pos 607                               |
| <b>CS1917</b> | Bovine                | Oakey            | 27° 26' S<br>151° 43' E | 7 Apr 1989  | (1C6)?   |                                           |
| <b>CS1918</b> | Bovine                | Oakey            | 27° 26' S<br>151° 43' E | 7 Apr 1989  | (1C6)?   |                                           |
| <b>CS1915</b> | Bovine                | Amberley         | 27° 38' S               | 12 Apr 1989 | (1C6)?   |                                           |

|                                    |                       |                |                         |             |                 |               |
|------------------------------------|-----------------------|----------------|-------------------------|-------------|-----------------|---------------|
|                                    |                       |                | 152° 42' E              |             |                 |               |
| <b>CS1920</b>                      | Bovine                | Injune         | 25° 51' S<br>148° 34' E | 10 May 1989 | (1C6)?          | G/T pos 142   |
| <b>CS1921</b>                      | Bovine                | Injune         | 25° 51' S<br>148° 34' E | May 1989    | (1C6)?          |               |
| <b>CS1923</b>                      | Bovine                | Cunnamulla     | 28° 04' S<br>145° 41' E | 16 May 1989 | (1C6)?          |               |
| <b>CS1924</b>                      | Bovine                | Roma           | 26° 34' S<br>148° 47' E | 1 Jun 1989  | ?               |               |
| <b>CS1927</b>                      | Bovine                | Kairi          | 17° 13' S<br>145° 32' E | 10 Apr 1975 | 1C6             | Not sequenced |
| <b>CS1947</b>                      | Bovine                | Calliope       | 24° 00' S<br>151° 12' E | 17 Nov 1989 | ?               | C/A pos 140   |
| <b>CS1951</b>                      | Bovine                | Willowbank     | 27° 39' S<br>152° 42' E | 19 Feb 1992 | ?               |               |
| <b>CS1952</b>                      | Bovine                | Amberley       | 27° 38' S<br>152° 42' E | Feb 1992    | ?               |               |
| <b>NORTHERN TERRITORY ISOLATES</b> |                       |                |                         |             |                 |               |
| <b>CS42</b>                        | <i>An. bancroftii</i> | Beatrice Hill  | 12° 39' S<br>131° 19' E | Apr 1975    | 12 SMB/6C6/4BHK | AF058324      |
| <b>DPP54</b>                       | Bovine                | Tortilla Flats | 13° 05' S<br>131° 14' E | Mar 1981    | ?               |               |
| <b>DPP57</b>                       | Bovine                | Tortilla Flats | 13° 05' S<br>131° 14' E | Mar 1981    | ?               |               |
| <b>V963</b>                        | Bovine                | Beatrice Hill  | 12° 39' S<br>131° 19' E | 5 Mar 1986  | 5BHK/1BSR       |               |
| <b>V8363</b>                       | Bovine                | Beatrice Hill  | 12° 39' S<br>131° 19' E | 23 Sep 2010 | 1C6/3BSR        |               |
| <b>V7203</b>                       | Bovine                | Berrimah       | 12° 26' S<br>130° 55' E | 12 Mar 2008 | 1C6/3BSR        |               |
| <b>V933</b>                        | Bovine                | Beatrice Hill  | 12° 39' S<br>131° 19' E | 20 Mar 1986 | 4BHK/xBSR       |               |
| <b>V6330</b>                       | Bovine                | Beatrice Hill  | 12° 39' S<br>131° 19' E | 28 Oct 2004 | 1C6/3BSR        |               |
| <b>BVLB6</b>                       | Bovine                | Berrimah       | 12° 26' S<br>130° 55' E | 19 Jan 2012 | EDTA Blood      |               |
| <b>BVLB14</b>                      | Bovine                | Berrimah       | 12° 26' S<br>130° 55' E | 19 Jan 2012 | EDTA Blood      |               |

| NEW SOUTH WALES ISOLATES |        |                 |                           |             |                              |
|--------------------------|--------|-----------------|---------------------------|-------------|------------------------------|
| <b>V1956</b>             | Bovine | near Sydney     | 33° 52' S<br>151° 12' E   | 1956        | 7 BHK (post arrival at AAHL) |
| <b>CS1937</b>            | Bovine | Wollongbar      | 28° 50' 0 S<br>153° 25' E | 15 Feb 1971 | 1C6                          |
| <b>V393</b>              | Bovine | Scone           | 32° 03' S<br>150° 52' E   | 1973        | ?                            |
| <b>V496</b>              | Bovine | Aberdeen        | 32° 10' S<br>150° 53' E   | 1974        | ?                            |
| <b>V511</b>              | Bovine | NSW             |                           | 1974        | ?                            |
| <b>V633</b>              | Bovine | Kiama           | 34° 40' S<br>150° 51' E   | 1974        | ?                            |
| <b>V629</b>              | Bovine | NSW             |                           | 1976        | EDTA Blood                   |
| <b>X837</b>              | Bovine | NSW             |                           | 1991        | EDTA Blood                   |
| <b>X760</b>              | Bovine | Camden          | 34° 03' S<br>150° 42' E   | 1991        | EDTA Blood                   |
| <b>D819</b>              | Bovine | Homeleigh       | 28° 35' S<br>153° 03' E   | 20 Jan 2010 | EDTA Blood                   |
| <b>D821</b>              | Bovine | Maitland        | 32° 44' S<br>151° 33' E   | 2 Feb 2010  | EDTA Blood                   |
| <b>D826</b>              | Bovine | Lightning Ridge | 29° 26' S<br>147° 59' E   | 2 Feb 2010  | EDTA Blood                   |
| <b>D831</b>              | Bovine | Gravesend       | 29° 35' S<br>150° 20' E   | 3 Feb 2010  | EDTA Blood                   |
| <b>D837</b>              | Bovine | Forbes          | 33° 23' S<br>148° 00' E   | 4 Feb 2010  | EDTA Blood                   |
| <b>D853</b>              | Bovine | Henty           | 35° 31' S<br>147° 02' E   | 24 Feb 2010 | EDTA Blood                   |
| <b>D905</b>              | Bovine | Merriwagga      | 33° 49' S<br>145° 37' E   | 1 Mar 2010  | EDTA Blood                   |
| <b>D901</b>              | Bovine | Kangaloon       | 34° 33' S<br>150° 32' E   | 2 Mar 2010  | EDTA Blood                   |
| <b>D909</b>              | Bovine | Cobargo         | 36° 23' S<br>149° 53' E   | 2 Mar 2010  | EDTA Blood                   |
| <b>D991</b>              | Bovine | Deniliquin      | 35° 31' 0 S<br>144° 59' E | 5 Mar 2010  | EDTA Blood                   |
| <b>D997</b>              | Bovine | O'Connell       | 33° 32' S<br>149° 44' E   | 7 Mar 2010  | EDTA Blood                   |

|               |        |             |                         |             |            |
|---------------|--------|-------------|-------------------------|-------------|------------|
| <b>E005</b>   | Bovine | Harden      | 34° 33' S<br>148° 22' E | 11 Mar 2010 | EDTA Blood |
| <b>E008</b>   | Bovine | Balranald   | 34° 38' S<br>143° 34' E | 18 Mar 2010 | EDTA Blood |
| <b>E012</b>   | Bovine | Gundagai    | 35° 04' S<br>148° 06' E | 16 Mar 2010 | EDTA Blood |
| <b>E015</b>   | Bovine | Kemps Creek | 33° 53' S<br>150° 47' E | 23 Mar 2010 | EDTA Blood |
| <b>E496</b>   | Bovine | Tenterfield | 29° 03' S<br>152° 01' E | 30 Jan 2011 | EDTA Blood |
| <b>EMAI66</b> | Bovine | Gloucester  | 32° 00' S<br>151° 58' E | 30 Mar 2011 | EDTA Blood |
| <b>E714</b>   | Bovine | Paterson    | 32° 36' S<br>151° 37' E | 27 Apr 2011 | EDTA Blood |

#### JAPAN ISOLATES

|                  |        |                 |  |      |      |          |
|------------------|--------|-----------------|--|------|------|----------|
| <b>Amakusa-1</b> | Bovine | Kumamoto        |  | 1988 | 5HL  | AB462031 |
| <b>Amakusa-2</b> | Bovine | Kumamoto        |  | 1988 | 5HL  | AB462032 |
| <b>Azuma</b>     | Bovine | Kagoshima       |  | 1988 | 7HL  | AB462033 |
| <b>Hirado-6</b>  | Bovine | Nagasaki        |  | 1988 | 3HL  | AB462029 |
| <b>Hirado-9</b>  | Bovine | Nagasaki        |  | 1988 | 4HL  | AB462030 |
| <b>ON01-1</b>    | Bovine | Tamara Island   |  | 2001 | 4HL  | AB462041 |
| <b>ON01-3</b>    | Bovine | Ishigaki Island |  | 2001 | 4HL  | AB462043 |
| <b>ON01-2</b>    | Bovine | Ishigaki Island |  | 2001 | 4HL  | AB462042 |
| <b>ON04-1</b>    | Bovine | Ishigaki Island |  | 2004 | 4HL  | AB462044 |
| <b>ON88-1</b>    | Bovine | Okinawa Island  |  | 1988 | 4HL  | AB462034 |
| <b>ON88-3</b>    | Bovine | Okinawa Island  |  | 1988 | 4HL  | AB462035 |
| <b>ON88-4</b>    | Bovine | Okinawa Island  |  | 1988 | 5HL  | AB462036 |
| <b>ON89-1</b>    | Bovine | Ishigaki Island |  | 1989 | 7HL  | AB462037 |
| <b>ON89-2</b>    | Bovine | Ishigaki Island |  | 1989 | 5HL  | AB462038 |
| <b>ON89-3</b>    | Bovine | Ishigaki Island |  | 1989 | 8HL  | AB462039 |
| <b>Onna-3</b>    | Bovine | Okinawa Island  |  | 1989 | 3HL  | AB462040 |
| <b>YHL</b>       | Bovine | Yamaguchi       |  | 1966 | 22HL | AB462028 |

#### TAIWAN ISOLATES

|                |        |           |  |          |  |          |
|----------------|--------|-----------|--|----------|--|----------|
| <b>TN1-84</b>  | Bovine |           |  | 1984     |  | AY935239 |
| <b>TN1-96</b>  | Bovine |           |  | 1996     |  | AY935240 |
| <b>TN88128</b> | Bovine | Kaoshiung |  | Sep 1999 |  | AF208840 |
| <b>TN1-01</b>  | Bovine |           |  | 2001     |  | AY935241 |

|                        |        |                |             |          |
|------------------------|--------|----------------|-------------|----------|
| <b>TN2-01</b>          | Bovine |                | 2001        | AY954451 |
| <b>TN3-01</b>          | Bovine |                | 2001        | AY954452 |
| <b>TN4-01</b>          | Bovine |                | 2001        | AY954453 |
| <b>TN5-01</b>          | Bovine |                | 2001        | AY954454 |
| <b>TN6-01</b>          | Bovine |                | 2001        | AY954455 |
| <b>TN7-01</b>          | Bovine |                | 2001        | AY954456 |
| <b>TN8-01</b>          | Bovine |                | 2001        | AY954457 |
| <b>TN9-01</b>          | Bovine |                | 2001        | AY954458 |
| <b>TN10-01</b>         | Bovine |                | 2001        | AY954459 |
| <b>TN11-01</b>         | Bovine |                | 2001        | AY954460 |
| <b>UL1</b>             | Bovine |                | 2001        | AY062166 |
| <b>HL</b>              | Bovine |                | 2002        | AY768942 |
| <b>TN124</b>           | Bovine |                | 2004        | AY818194 |
| <b>CHINA ISOLATES</b>  |        |                |             |          |
| <b>JB76H</b>           | Bovine | Beijing        | 1976        | JX564640 |
| <b>LYC11</b>           | Bovine | Louyang, Henan | Aug 2011    | JX564638 |
| <b>JT02L</b>           | Bovine | Zhejiang       | 2002        | JX564639 |
| <b>LS11</b>            | Bovine | Louyang, Henan | Aug 2011    | JX564637 |
| <b>JN1</b>             | Bovine | Shandong       | 2011        | JX174661 |
| <b>ISRAEL ISOLATES</b> |        |                |             |          |
| <b>ISR10-1</b>         | Bovine |                | 2010        | JN833633 |
| <b>ISR10-2</b>         | Bovine |                | 2010        | JN833634 |
| <b>ISR10-3</b>         | Bovine |                | 2010        | JN833635 |
| <b>ISR04</b>           | Bovine |                | 2004        | JN833632 |
| <b>IL01</b>            | Bovine |                | 2001        | JN833631 |
| <b>IL08</b>            | Bovine |                | 2008        | JN646090 |
| <b>ISR00</b>           | Bovine |                | 2000        | JN833639 |
| <b>IL00</b>            | Bovine |                | 2000        | JQ008943 |
| <b>TURKEY ISOLATES</b> |        |                |             |          |
| <b>CP62</b>            | Bovine |                | Jul 2008    | GQ229451 |
| <b>CP77</b>            | Bovine |                | Jul 2008    | GQ229452 |
| <b>ADYMN</b>           | Bovine |                | 2012        | KC788421 |
| <b>CP3</b>             | Bovine |                | 10 Aug 2012 | KC470310 |
| <b>CP13</b>            | Bovine |                | 10 Aug 2012 | KC470311 |
| <b>CU15</b>            | Bovine |                | 10 Aug 2012 | KC470312 |
| <b>CU16</b>            | Bovine |                | 10 Aug 2012 | KC470313 |

\* SMB = suckling mouse brain; BHK = baby hamster kidney (BHK-21); BSR = baby hamster kidney (BSR); C6 = *Aedes albopictus* (C6/36); HL = hamster lung (HmLu-1)
